# Supplementary material
Source: publisher site journal article supplement (https://www.dovepress.com/article/451589)

**Supplementary figures legends**

Supplementary Figure 1. Graphical representation of SBA-15 synthesis process and Ac2-26 complexation into SBA-15 microparticle


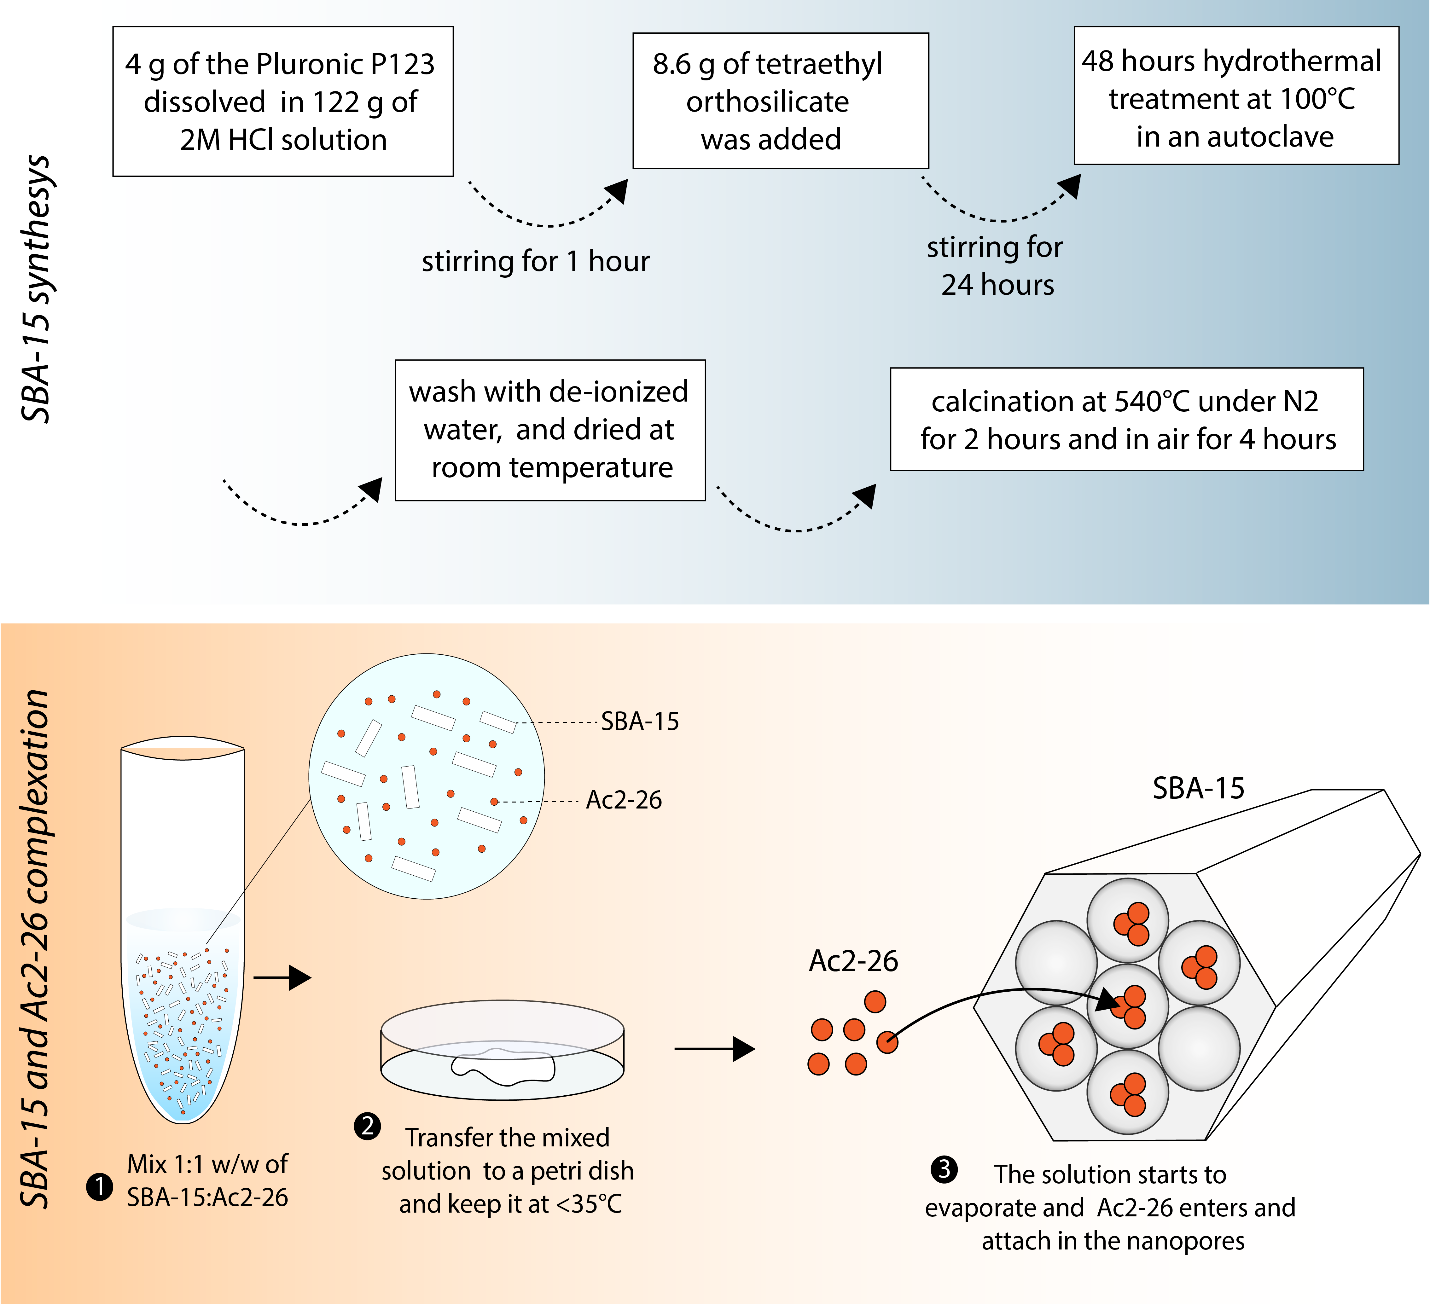


*synthesis*

Supplementary Figure 2.

Schematic method for colitis development with DSS 2% and treatments.


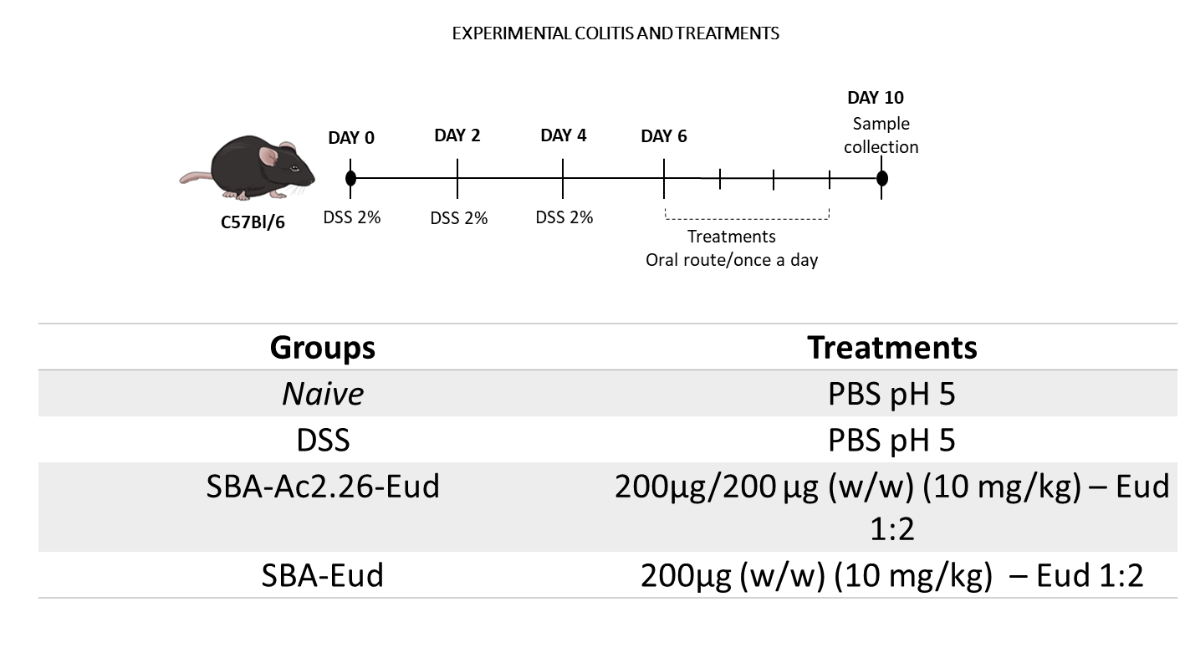


Supplementary Figure 3.

Transmission electron microscopy of 2BA-25, SBA-15-Ac2-26 and FITC-SBA15


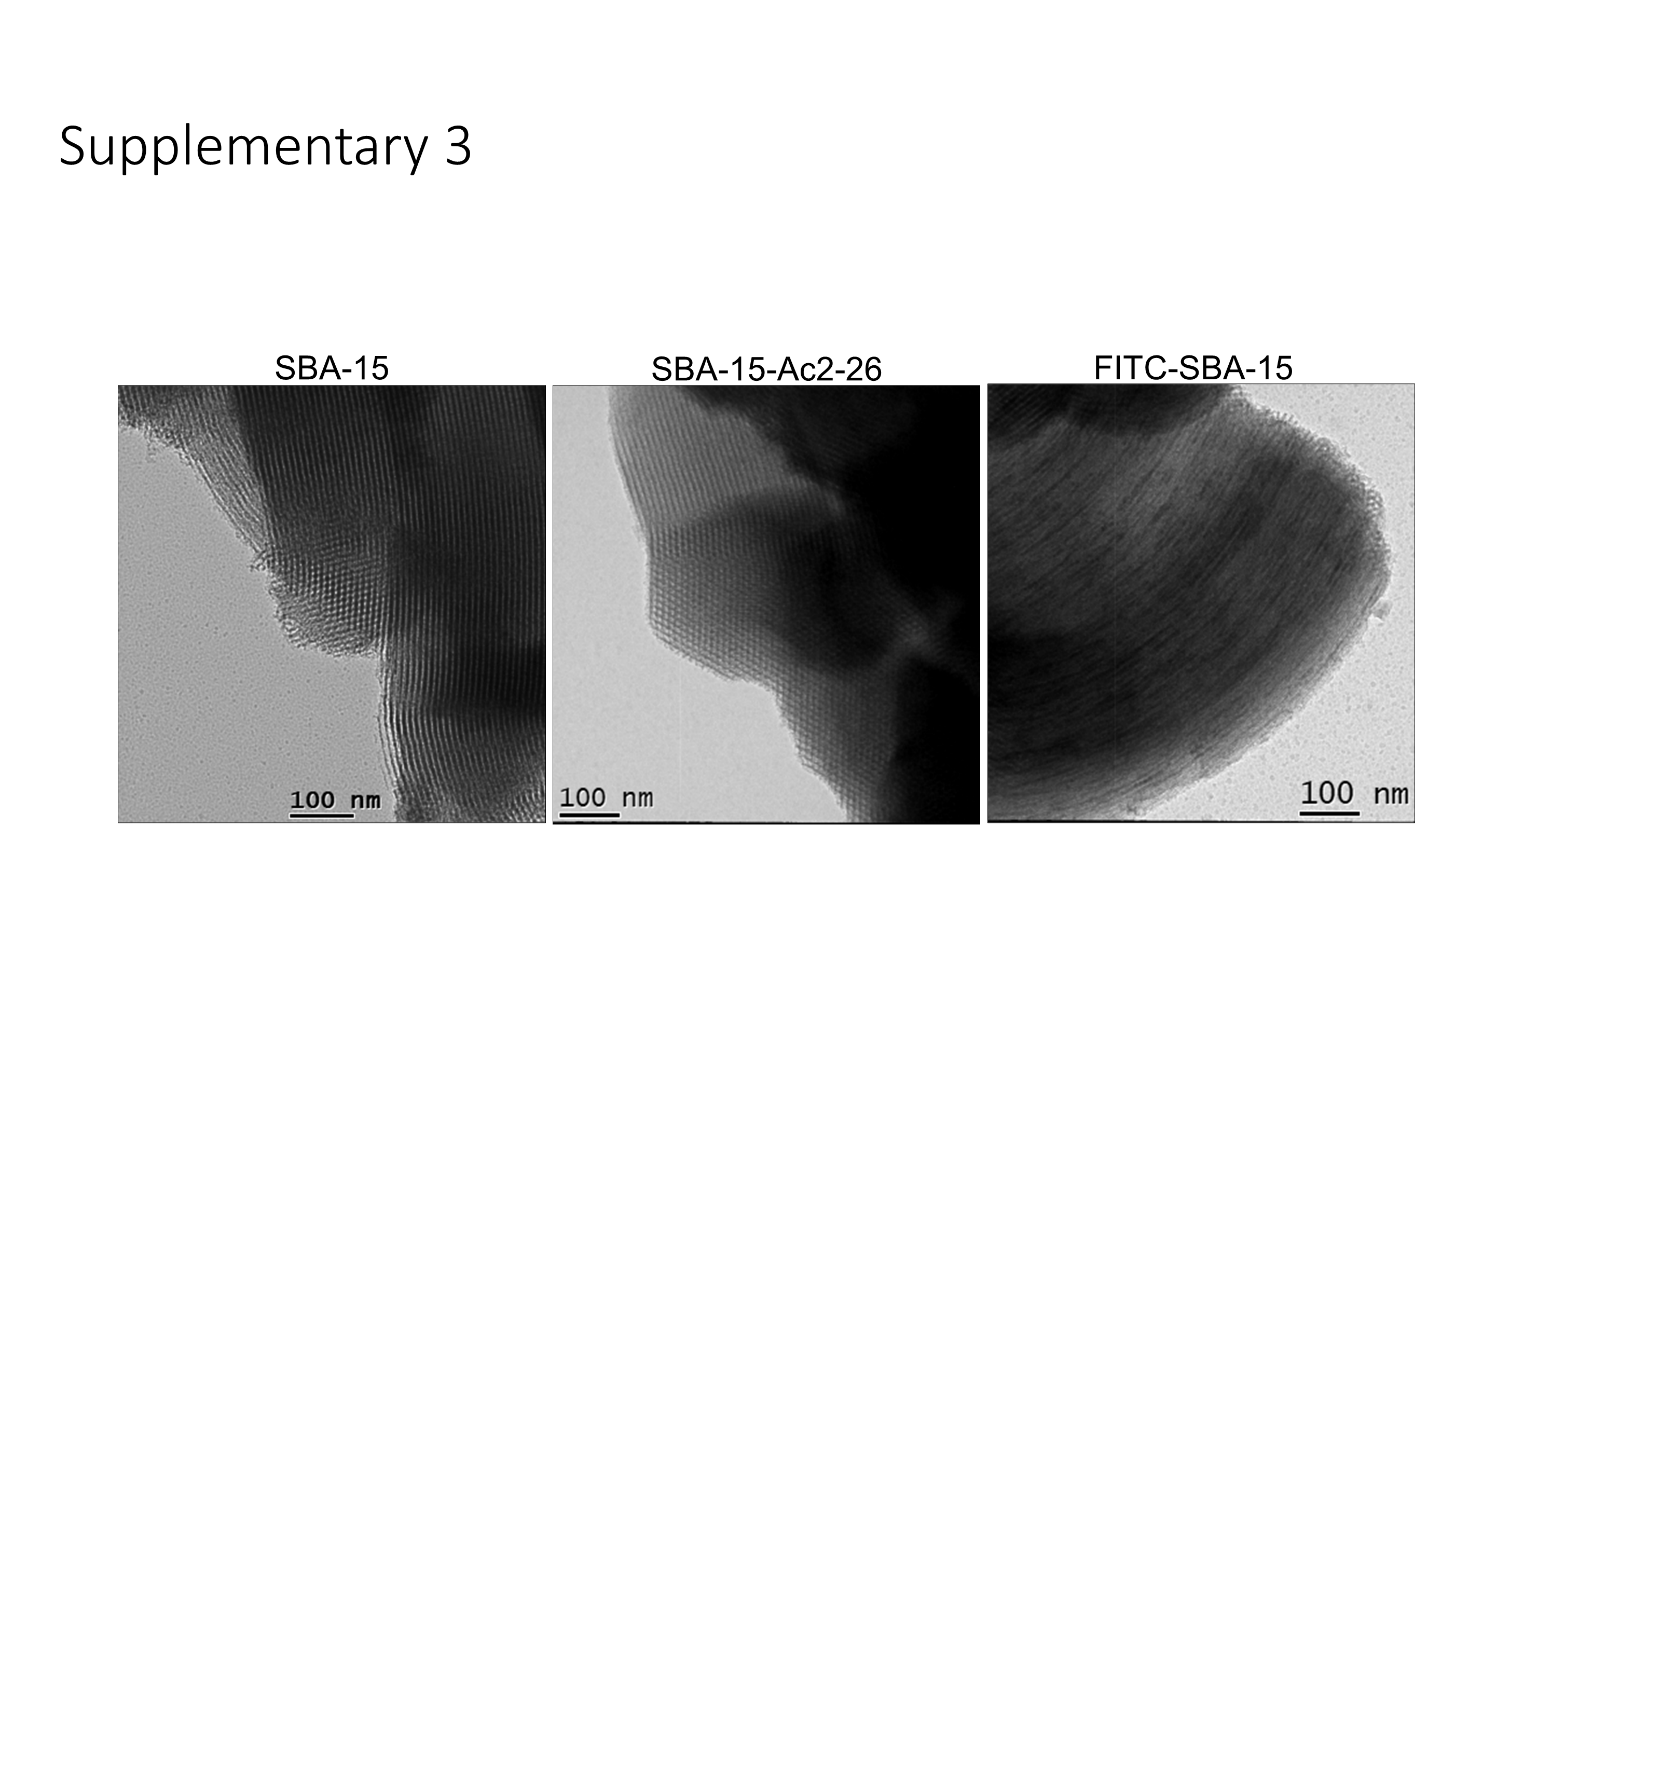


Supplementary Figure 4.

SAXS experimental data of the pure SBA-15 (L1), the functionalized material (L1+APTES) and the complex with FITC (filled circles) fitted by the SBA-15 model (continuous line).


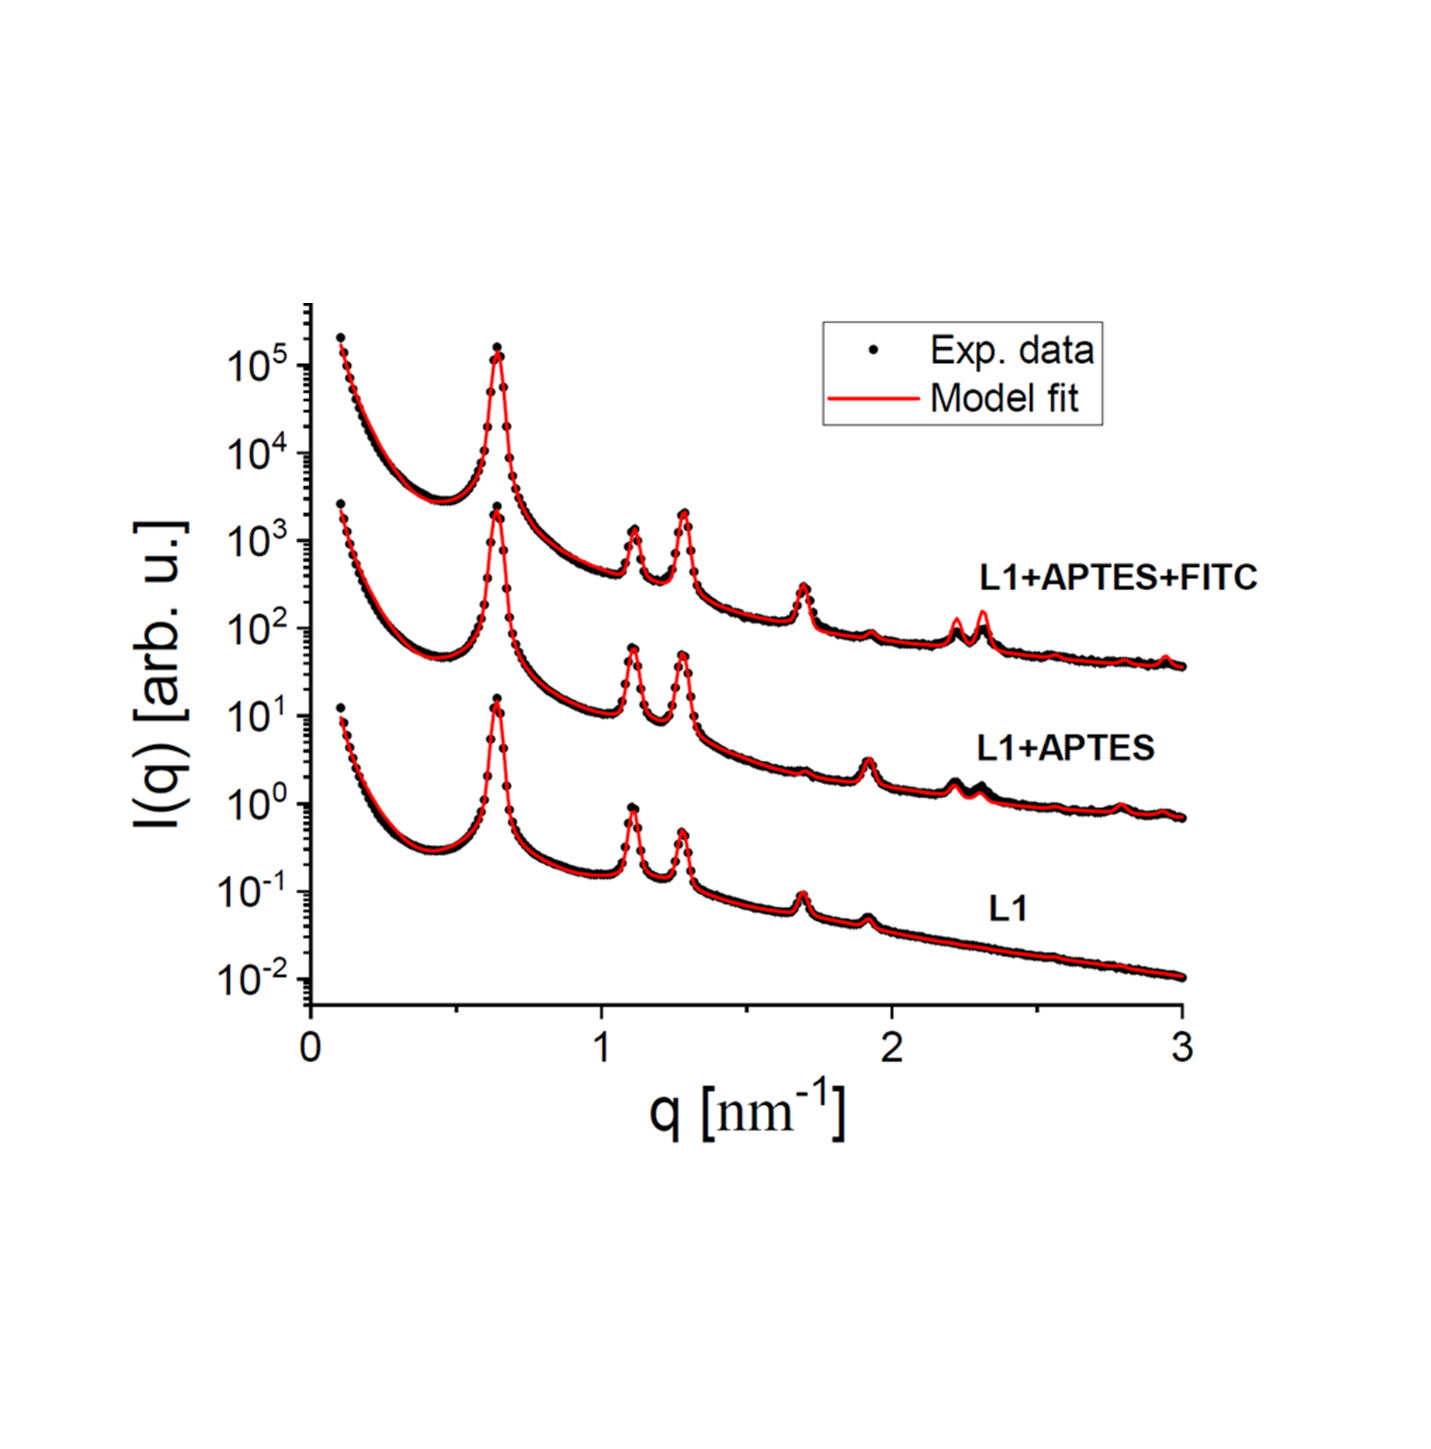


Supplementary Figure 5.

**A** Representatives showingEDM untreated control. **B** Representatives showingUntreated control for 3D mice intestinal organoid.


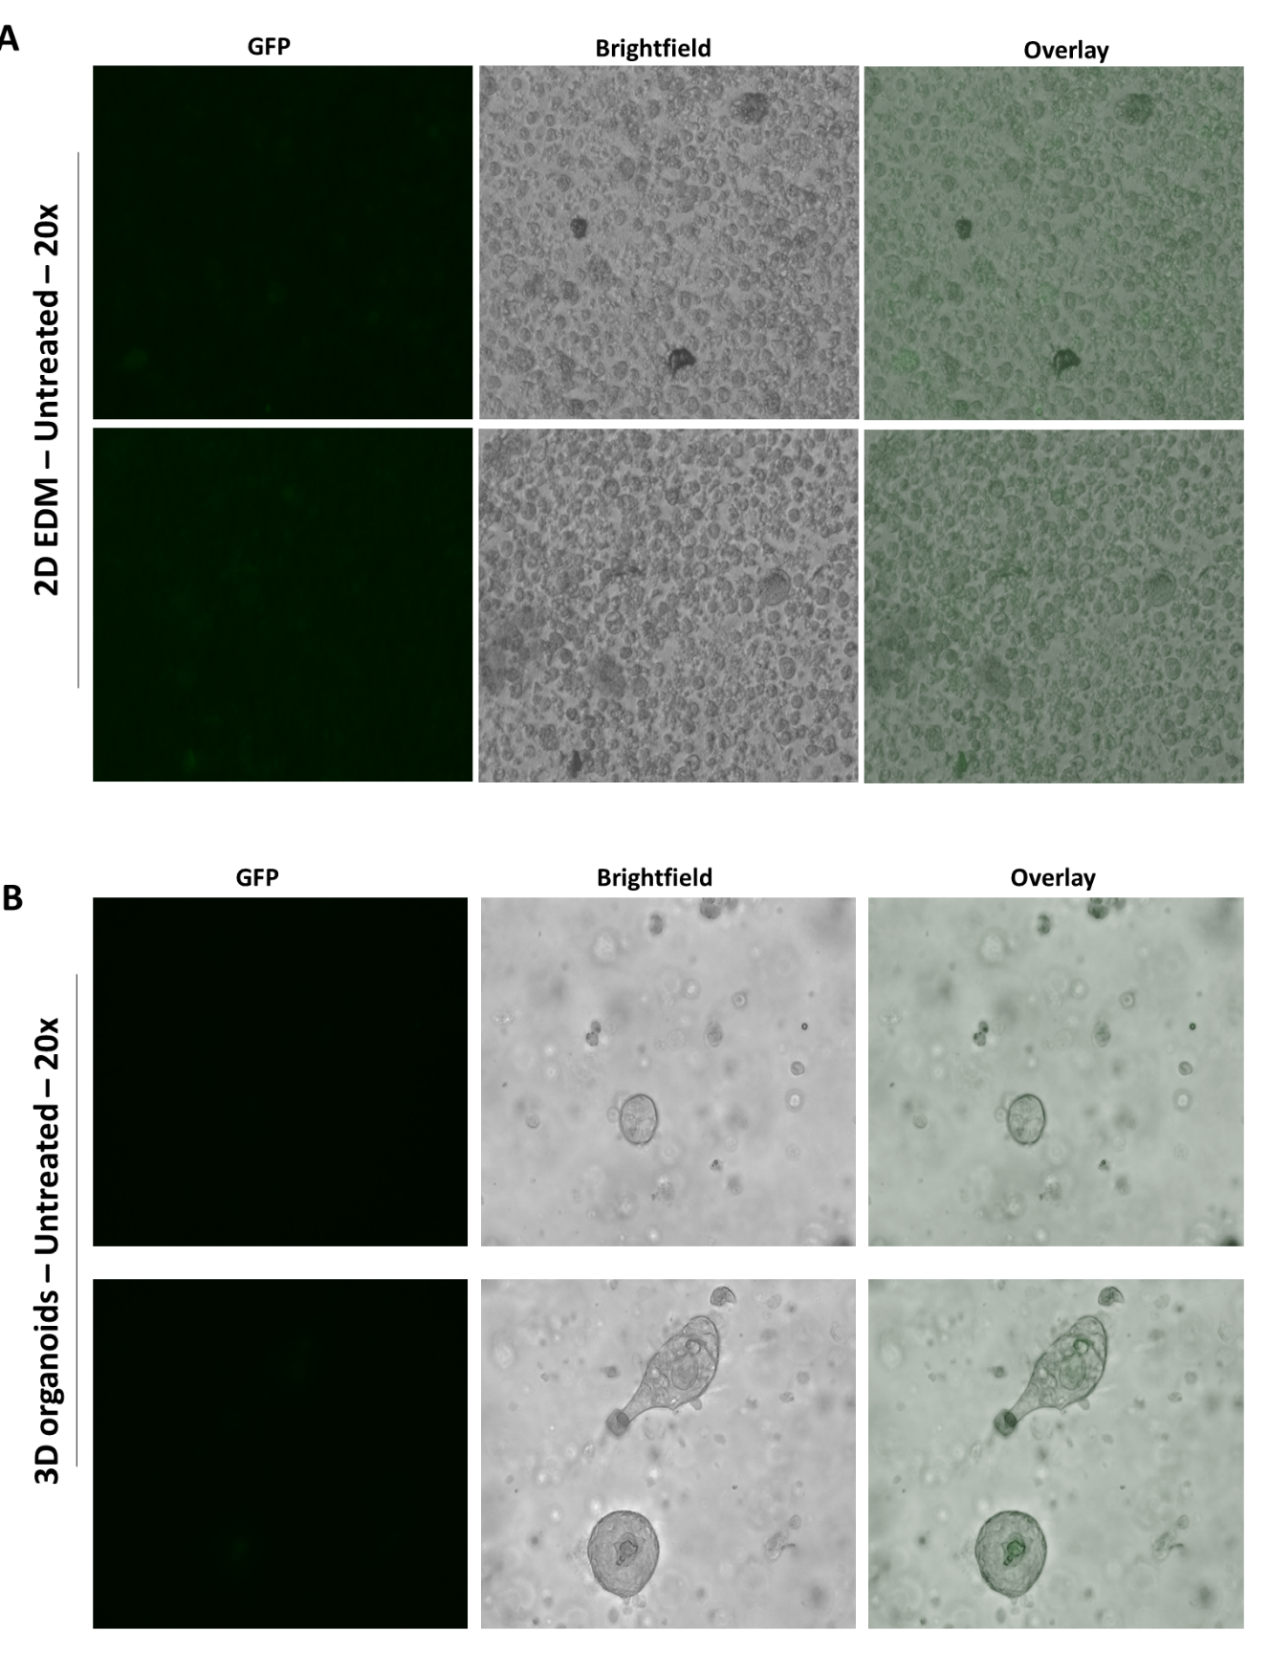


Supplementary Figure 6. Uptake of FITC-SBA-15 by Caco-2 cells. The graph represents the percentage of cells positive for FITC. The histogram represents the flow cytometry median of fluorescence obtained after adding FITC-SBA. The dot plot represents the average percentage obtained. Three biological replicates were used to analyze the percentage of uptake. ** <p 0.01.


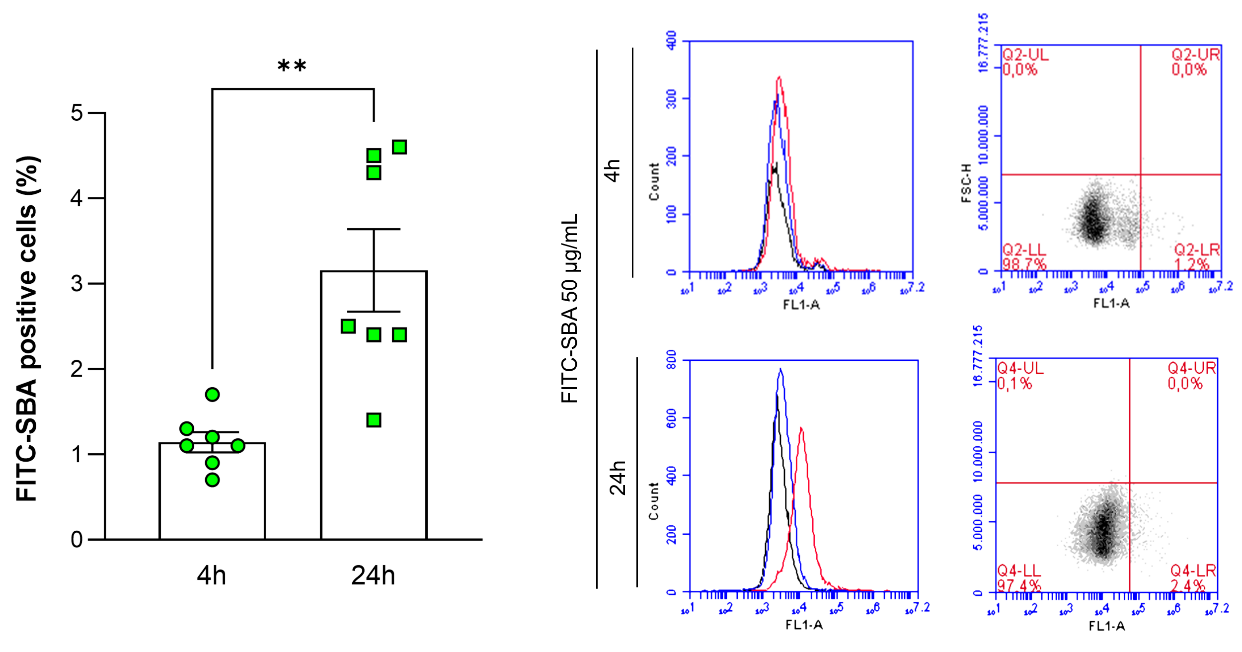


Supplementary Figure 7.

*In vitro* release of Ac2-26 from SBA-15 plus Eudragit® in pH 1.2 (gastric) and pH 6.8 (intestinal). For functionalization, 200 µg of Ac2-26 diluted in PBS were added to 200 µg of SBA-15. The proportion of the polymer Eudragit® was 1:2 for SBA-15-Ac2-26 solution. To analyze the concentration of Ac2-26 released was used Bradford dye-binding method. **** p<0.0001 pH 6.8 vs pH 1.2.


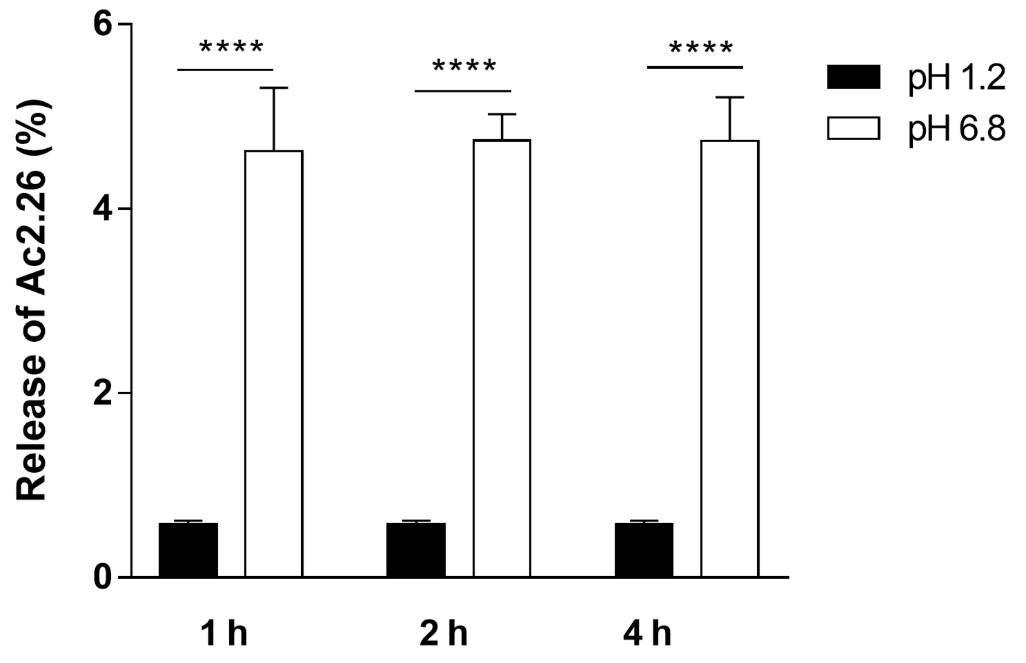

Supplement: Supplementary file 1 [file get_supplementary_file.php]
